# Supplementary material
Source: publisher site journal article supplement (https://www.dovepress.com/article/440409)
Supplement: Supplementary file 1 [file get_supplementary_file.php]

**Supplementary Material 1: Sequencing library preparation and single-cell RNA-seq data preprocessing**

We used Chromium Next GEM Single Cell 3ʹ Reagent Kits v3.1 on the Chromium Controller (10× Genomics) to prepare single-cell RNA-seq libraries. Individual cells on a microfluidic chip require reagents to stimulate reactions; in this study, gel beads with cell barcode sequences wrapped in oil droplets were used to generate gel beads in emulsion (GEMs). In the GEM oil droplets, the cells were lysed to release RNA, which binds to a poly(dT) primer with the cell barcode unique molecular identifier (UMI) for complementary strand extension and adds 3 C bases to the end of the extended strand. The CCC end then completes the reverse transcription reaction by complementarily pairing with the rGrGrG of the template switch oligo, using it as a template; subsequently, the GEMs are broken, recovered, and then enriched using PCR amplification of the cDNA to construct a library. The cDNA was recovered using magnetic beads [SPRI select Reagent (60 mL) B]. The full-length cDNA was then amplified via PCR and purified. The cDNA was quality controlled for concentration using Qubit 4.0 (Thermo Fisher Scientific) and integrity using Agilent 2100 (Aligent Technologies 2100 Bioanalyzer 2100 Expert, Version B.02.10.SI764). Library construction consisted of fragmentation, end repair, A-tailing, splice ligation, and index amplification. The library concentration was quality controlled using Qubit 4.0, and the library fragments were quality controlled using Qseq400 (SW Version: 3.4.0.0.6132, PID: 15420). Sequencing was performed on an Illumina NovaSeq 6000 with a sequencing depth of at least 50,000 reads/cell and 150 bp (PE150) paired-end reads (performed by Biomarker Technologies Corporation, Beijing, China).

We used 10x Cell Ranger v7.0 to analyze the sequencing data. The Cell Ranger software called STAR (15) was used to match Read2 to the reference genome statistically. The read coverage information for each genome region was counted based on the matching results from the STAR analysis and the information in the reference dataset (gtf/gff files). The reads that matched known transcripts and were on the same strand were used for comparison with the transcripts. If the reads are compared to a known individual gene, they are considered unique compared to the transcriptome. Only reads compared to the transcript were counted as UMI. Cell Ranger was used to remove the duplicate UMIs for each gene in each barcode; the number of unique UMIs was counted to determine the gene expression in each cell.


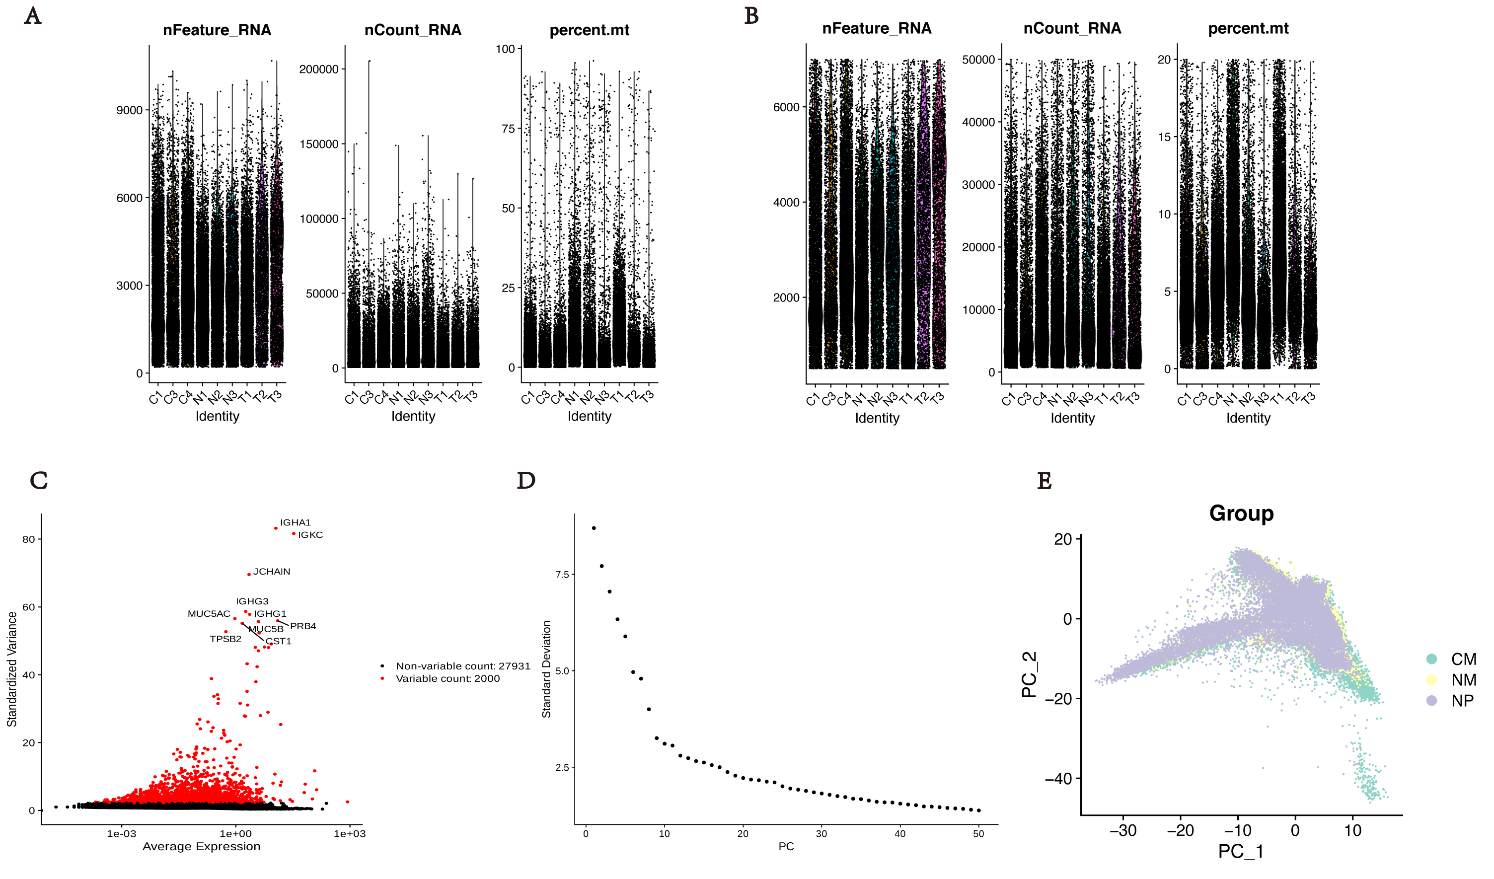


**Supplementary Figure 1.** Quality control.(A)Distribution map of nFeature_RNA, nCount_RNA, and percent.mt before quality control. (B) Distribution map of nFeature_RNA, nCount_RNA, and percent.mt after quality control. (C) Identification of 2,000 hypervariable genes. Red dots represent highly variable genes, and black dots represent non-highly variable genes. (D) Fragmentation graph screening of optional dimensions. Horizontal coordinates represent optional dimensions, and vertical coordinates represent standard deviations. (E) Distribution of cells in each group (CM, NM, and NP) in the two principal components of PCA.

**
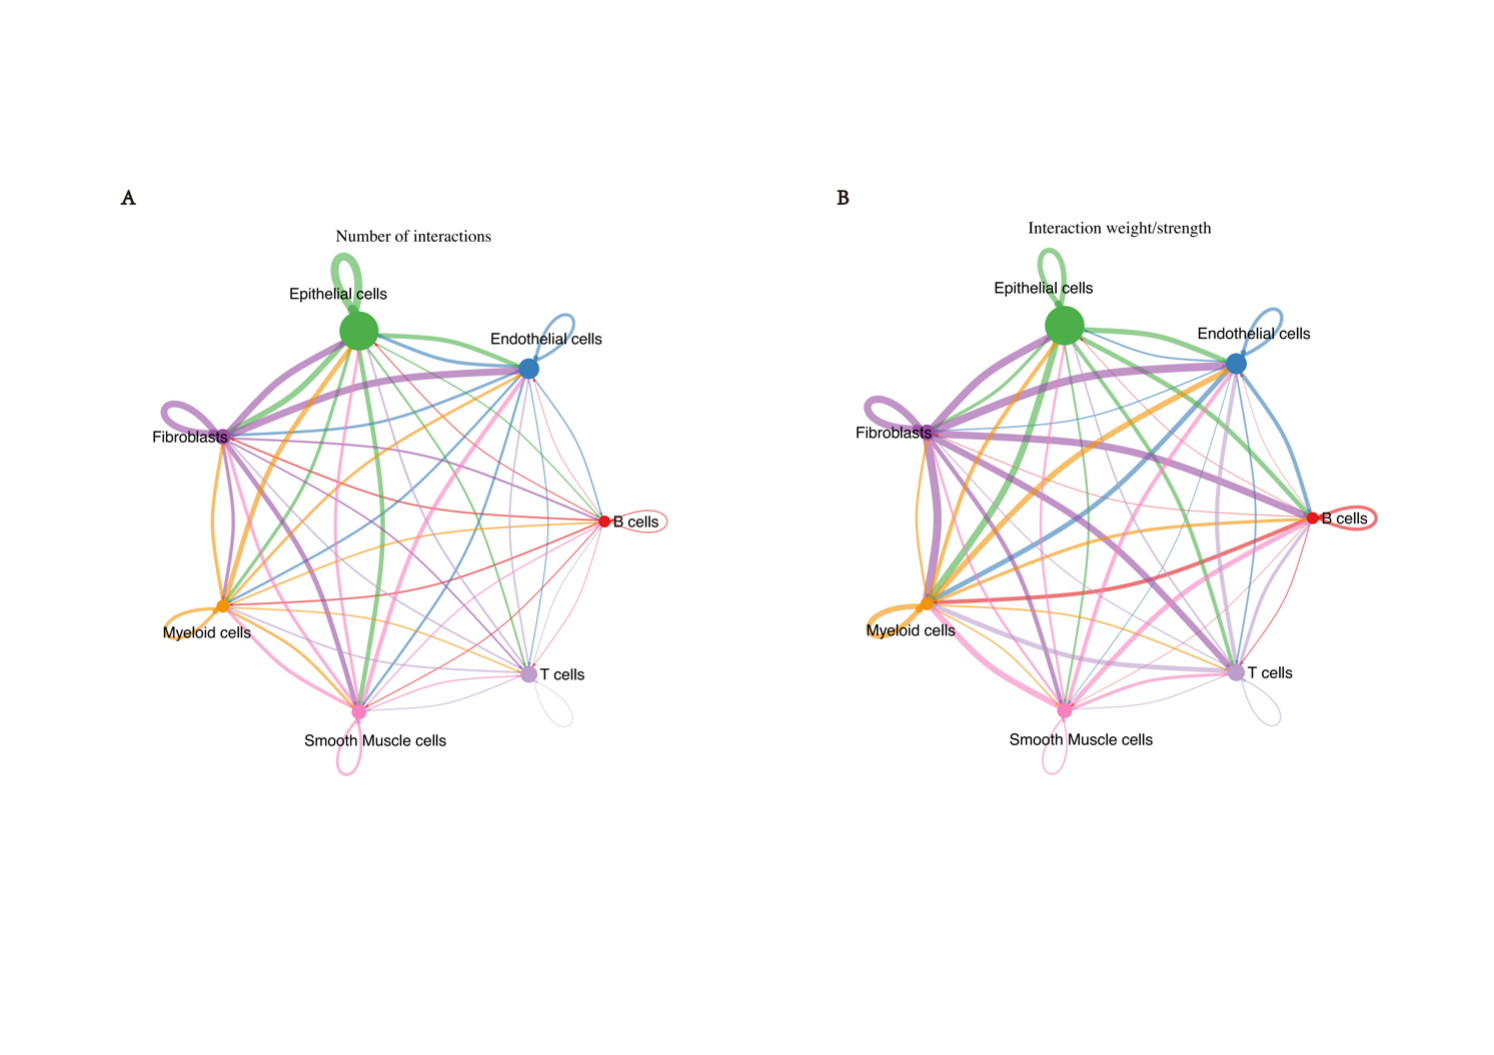
 Supplementary Figure 2.** Cell communication.Circle maps (A) and intensity maps (B) of cell communication in epithelial cells, endothelial cells, fibroblasts, smooth muscle cells, B cells, T cells, and myeloid cells.

**
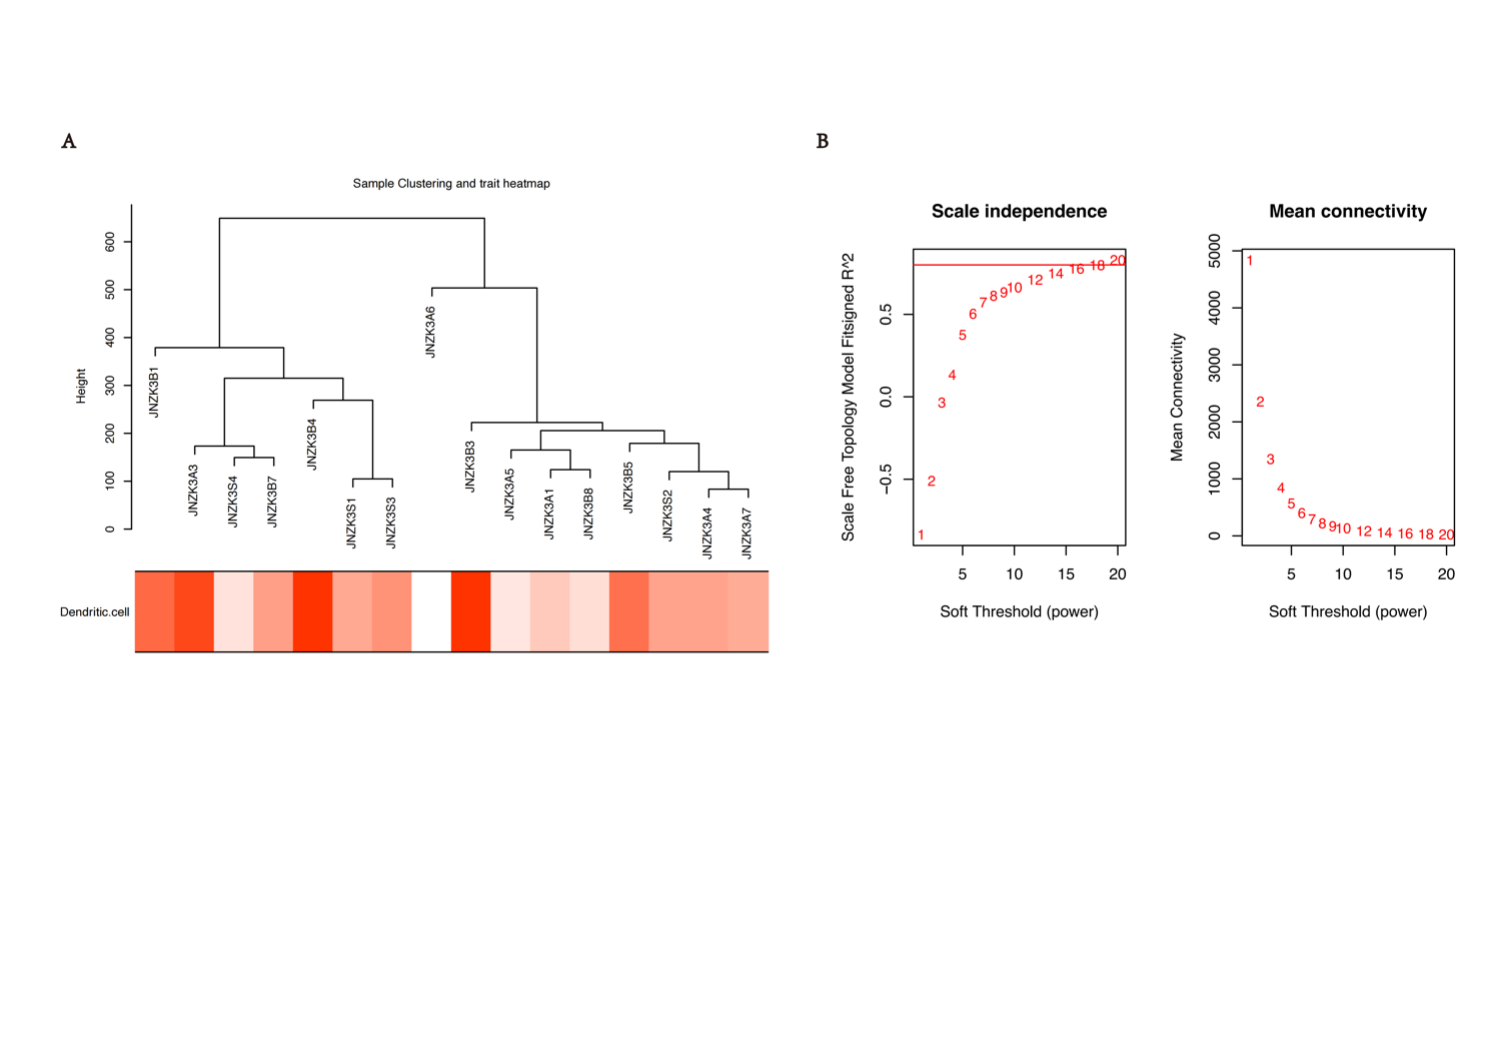
**

**Supplementary Figure 3.** Sample clustering analysis.(A)Tree of sample clustering; vertical coordinates represent the distances between samples. (B) Soft thresholds, where the threshold was 0.8.

**
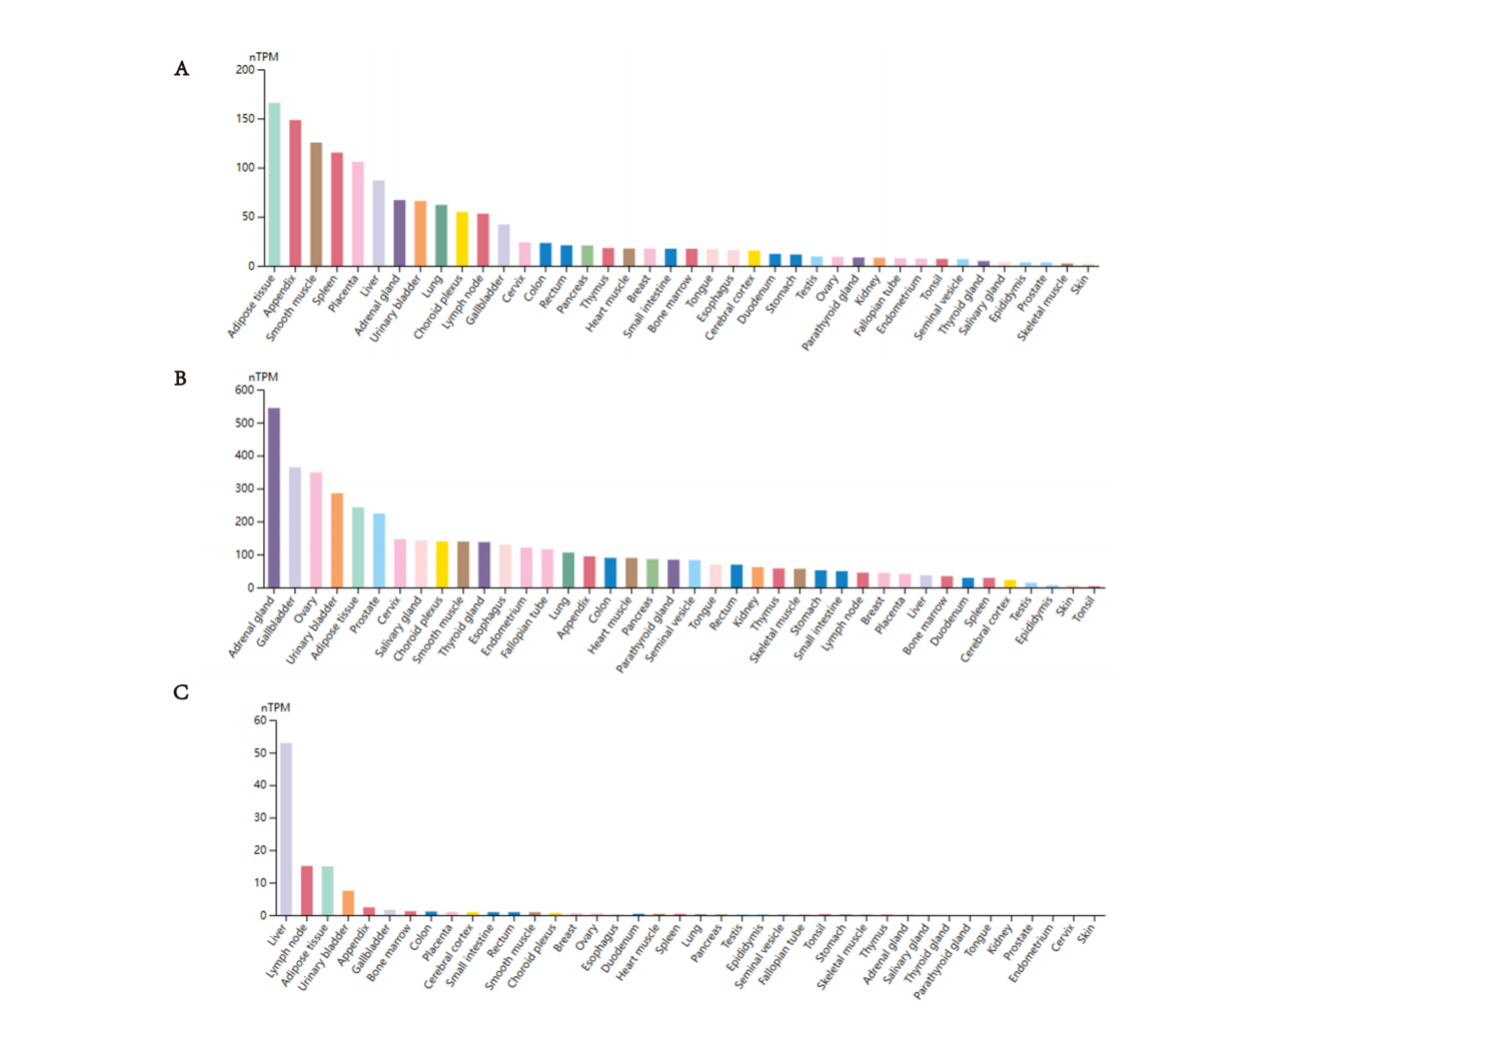
**

**Supplementary Figure 4.** Expression levels of biomarkers in different tissues.Expression levels of (A) NR4A1, (B) CLEC4G, and (C) CD163 in different tissues according to the HPA database.

**Supplementary Table 1:** The list of Gene Ontology (GO) enrichment analysis of candidate genes.

| **ONTOLOGY** | **ID** | **Description** | **GeneRatio** | **BgRatio** | **pvalue** | **p.adjust** | **qvalue** | **geneID** | **Count** |
| --- | --- | --- | --- | --- | --- | --- | --- | --- | --- |
| BP | GO:0071385 | cellular response to glucocorticoid stimulus | 2023/2/17 | 55/18903 | 0.001099 | 0.162365 | 0.124622 | ZFP36L2/CYP1B1 | 2 |
| BP | GO:0071384 | cellular response to corticosteroid stimulus | 2023/2/17 | 64/18903 | 0.001485 | 0.162365 | 0.124622 | ZFP36L2/CYP1B1 | 2 |
| BP | GO:0033077 | T cell differentiation in thymus | 2023/2/17 | 86/18903 | 0.002662 | 0.162365 | 0.124622 | CLEC4G/ZFP36L2 | 2 |
| BP | GO:0007032 | endosome organization | 2023/2/17 | 96/18903 | 0.003303 | 0.162365 | 0.124622 | ATP6V1A/SNX3 | 2 |
| BP | GO:1901655 | cellular response to ketone | 2023/2/17 | 105/18903 | 0.003936 | 0.162365 | 0.124622 | POSTN/CYP1B1 | 2 |
| BP | GO:0044344 | cellular response to fibroblast growth factor stimulus | 2023/2/17 | 114/18903 | 0.004621 | 0.162365 | 0.124622 | NR4A1/ZFP36L2 | 2 |
| BP | GO:0071774 | response to fibroblast growth factor | 2023/2/17 | 120/18903 | 0.005107 | 0.162365 | 0.124622 | NR4A1/ZFP36L2 | 2 |
| BP | GO:0051384 | response to glucocorticoid | 2023/2/17 | 142/18903 | 0.007078 | 0.162365 | 0.124622 | ZFP36L2/CYP1B1 | 2 |
| BP | GO:1903900 | regulation of viral life cycle | 2023/2/17 | 142/18903 | 0.007078 | 0.162365 | 0.124622 | CLEC4G/SNX3 | 2 |
| BP | GO:0046718 | viral entry into host cell | 2023/2/17 | 151/18903 | 0.007969 | 0.162365 | 0.124622 | CLEC4G/SNX3 | 2 |
| BP | GO:0007584 | response to nutrient | 2023/2/17 | 154/18903 | 0.008277 | 0.162365 | 0.124622 | POSTN/CYP1B1 | 2 |
| BP | GO:0044409 | entry into host | 2023/2/17 | 158/18903 | 0.008695 | 0.162365 | 0.124622 | CLEC4G/SNX3 | 2 |
| BP | GO:0002291 | T cell activation via T cell receptor contact with antigen bound to MHC molecule on antigen presenting cell | 2023/1/17 | 10/18903 | 0.008959 | 0.162365 | 0.124622 | APBB1IP | 1 |
| BP | GO:0033085 | negative regulation of T cell differentiation in thymus | 2023/1/17 | 10/18903 | 0.008959 | 0.162365 | 0.124622 | CLEC4G | 1 |
| BP | GO:0097267 | omega-hydroxylase P450 pathway | 2023/1/17 | 10/18903 | 0.008959 | 0.162365 | 0.124622 | CYP1B1 | 1 |
| BP | GO:0002181 | cytoplasmic translation | 2023/2/17 | 161/18903 | 0.009015 | 0.162365 | 0.124622 | RPS8/UBA52 | 2 |
| BP | GO:0050792 | regulation of viral process | 2023/2/17 | 162/18903 | 0.009123 | 0.162365 | 0.124622 | CLEC4G/SNX3 | 2 |
| BP | GO:0031960 | response to corticosteroid | 2023/2/17 | 165/18903 | 0.00945 | 0.162365 | 0.124622 | ZFP36L2/CYP1B1 | 2 |
| BP | GO:0061299 | retina vasculature morphogenesis in camera-type eye | 2023/1/17 | 11/18903 | 0.009851 | 0.162365 | 0.124622 | CYP1B1 | 1 |
| BP | GO:0033083 | regulation of immature T cell proliferation | 2023/1/17 | 12/18903 | 0.010742 | 0.162365 | 0.124622 | CLEC4G | 1 |
| BP | GO:0033084 | regulation of immature T cell proliferation in thymus | 2023/1/17 | 12/18903 | 0.010742 | 0.162365 | 0.124622 | CLEC4G | 1 |
| BP | GO:0033629 | negative regulation of cell adhesion mediated by integrin | 2023/1/17 | 12/18903 | 0.010742 | 0.162365 | 0.124622 | CYP1B1 | 1 |
| BP | GO:0036295 | cellular response to increased oxygen levels | 2023/1/17 | 12/18903 | 0.010742 | 0.162365 | 0.124622 | ATP6V1A | 1 |
| BP | GO:0048103 | somatic stem cell division | 2023/1/17 | 12/18903 | 0.010742 | 0.162365 | 0.124622 | ZFP36L2 | 1 |
| BP | GO:0061795 | Golgi lumen acidification | 2023/1/17 | 12/18903 | 0.010742 | 0.162365 | 0.124622 | ATP6V1A | 1 |
| BP | GO:0043534 | blood vessel endothelial cell migration | 2023/2/17 | 177/18903 | 0.010811 | 0.162365 | 0.124622 | NR4A1/CYP1B1 | 2 |
| BP | GO:0044000 | movement in host | 2023/2/17 | 183/18903 | 0.011522 | 0.162365 | 0.124622 | CLEC4G/SNX3 | 2 |
| BP | GO:0033079 | immature T cell proliferation | 2023/1/17 | 13/18903 | 0.011632 | 0.162365 | 0.124622 | CLEC4G | 1 |
| BP | GO:0033080 | immature T cell proliferation in thymus | 2023/1/17 | 13/18903 | 0.011632 | 0.162365 | 0.124622 | CLEC4G | 1 |
| BP | GO:0044849 | estrous cycle | 2023/1/17 | 14/18903 | 0.012522 | 0.162365 | 0.124622 | CYP1B1 | 1 |
| BP | GO:0048388 | endosomal lumen acidification | 2023/1/17 | 14/18903 | 0.012522 | 0.162365 | 0.124622 | ATP6V1A | 1 |
| BP | GO:1900153 | positive regulation of nuclear-transcribed mRNA catabolic process, deadenylation-dependent decay | 2023/1/17 | 15/18903 | 0.01341 | 0.162365 | 0.124622 | ZFP36L2 | 1 |
| BP | GO:0051701 | biological process involved in interaction with host | 2023/2/17 | 203/18903 | 0.014037 | 0.162365 | 0.124622 | CLEC4G/SNX3 | 2 |
| BP | GO:0014819 | regulation of skeletal muscle contraction | 2023/1/17 | 16/18903 | 0.014298 | 0.162365 | 0.124622 | NR4A1 | 1 |
| BP | GO:0046642 | negative regulation of alpha-beta T cell proliferation | 2023/1/17 | 16/18903 | 0.014298 | 0.162365 | 0.124622 | CLEC4G | 1 |
| BP | GO:0061469 | regulation of type B pancreatic cell proliferation | 2023/1/17 | 16/18903 | 0.014298 | 0.162365 | 0.124622 | NR4A1 | 1 |
| BP | GO:1901654 | response to ketone | 2023/2/17 | 205/18903 | 0.014301 | 0.162365 | 0.124622 | POSTN/CYP1B1 | 2 |
| BP | GO:0071383 | cellular response to steroid hormone stimulus | 2023/2/17 | 209/18903 | 0.014834 | 0.162365 | 0.124622 | ZFP36L2/CYP1B1 | 2 |
| BP | GO:0045619 | regulation of lymphocyte differentiation | 2023/2/17 | 210/18903 | 0.014969 | 0.162365 | 0.124622 | CLEC4G/ZFP36L2 | 2 |
| BP | GO:0009404 | toxin metabolic process | 2023/1/17 | 17/18903 | 0.015185 | 0.162365 | 0.124622 | CYP1B1 | 1 |
| BP | GO:0061158 | 3'-UTR-mediated mRNA destabilization | 2023/1/17 | 17/18903 | 0.015185 | 0.162365 | 0.124622 | ZFP36L2 | 1 |
| BP | GO:0061548 | ganglion development | 2023/1/17 | 17/18903 | 0.015185 | 0.162365 | 0.124622 | CYP1B1 | 1 |
| BP | GO:0072378 | blood coagulation, fibrin clot formation | 2023/1/17 | 17/18903 | 0.015185 | 0.162365 | 0.124622 | F13A1 | 1 |
| BP | GO:0090136 | epithelial cell-cell adhesion | 2023/1/17 | 17/18903 | 0.015185 | 0.162365 | 0.124622 | CYP1B1 | 1 |
| BP | GO:0032354 | response to follicle-stimulating hormone | 2023/1/17 | 18/18903 | 0.016072 | 0.162365 | 0.124622 | CYP1B1 | 1 |
| BP | GO:2000641 | regulation of early endosome to late endosome transport | 2023/1/17 | 18/18903 | 0.016072 | 0.162365 | 0.124622 | SNX3 | 1 |
| BP | GO:0019373 | epoxygenase P450 pathway | 2023/1/17 | 19/18903 | 0.016958 | 0.162365 | 0.124622 | CYP1B1 | 1 |
| BP | GO:0042574 | retinal metabolic process | 2023/1/17 | 19/18903 | 0.016958 | 0.162365 | 0.124622 | CYP1B1 | 1 |
| BP | GO:0060216 | definitive hemopoiesis | 2023/1/17 | 19/18903 | 0.016958 | 0.162365 | 0.124622 | ZFP36L2 | 1 |
| BP | GO:0061298 | retina vasculature development in camera-type eye | 2023/1/17 | 19/18903 | 0.016958 | 0.162365 | 0.124622 | CYP1B1 | 1 |
| BP | GO:0071371 | cellular response to gonadotropin stimulus | 2023/1/17 | 20/18903 | 0.017843 | 0.162365 | 0.124622 | CYP1B1 | 1 |
| BP | GO:0072376 | protein activation cascade | 2023/1/17 | 20/18903 | 0.017843 | 0.162365 | 0.124622 | F13A1 | 1 |
| BP | GO:0071356 | cellular response to tumor necrosis factor | 2023/2/17 | 234/18903 | 0.018362 | 0.162365 | 0.124622 | ZFP36L2/CYP1B1 | 2 |
| BP | GO:0000083 | regulation of transcription involved in G1/S transition of mitotic cell cycle | 2023/1/17 | 21/18903 | 0.018727 | 0.162365 | 0.124622 | BACH1 | 1 |
| BP | GO:0007042 | lysosomal lumen acidification | 2023/1/17 | 21/18903 | 0.018727 | 0.162365 | 0.124622 | ATP6V1A | 1 |
| BP | GO:0046597 | negative regulation of viral entry into host cell | 2023/1/17 | 22/18903 | 0.01961 | 0.162365 | 0.124622 | SNX3 | 1 |
| BP | GO:0050765 | negative regulation of phagocytosis | 2023/1/17 | 22/18903 | 0.01961 | 0.162365 | 0.124622 | SNX3 | 1 |
| BP | GO:0045444 | fat cell differentiation | 2023/2/17 | 244/18903 | 0.019864 | 0.162365 | 0.124622 | NR4A1/ZFP36L2 | 2 |
| BP | GO:0016197 | endosomal transport | 2023/2/17 | 247/18903 | 0.020324 | 0.162365 | 0.124622 | ITSN1/SNX3 | 2 |
| BP | GO:1903902 | positive regulation of viral life cycle | 2023/1/17 | 24/18903 | 0.021375 | 0.162365 | 0.124622 | CLEC4G | 1 |
| BP | GO:0034612 | response to tumor necrosis factor | 2023/2/17 | 254/18903 | 0.021416 | 0.162365 | 0.124622 | ZFP36L2/CYP1B1 | 2 |
| BP | GO:0035751 | regulation of lysosomal lumen pH | 2023/1/17 | 26/18903 | 0.023137 | 0.162365 | 0.124622 | ATP6V1A | 1 |
| BP | GO:1900151 | regulation of nuclear-transcribed mRNA catabolic process, deadenylation-dependent decay | 2023/1/17 | 26/18903 | 0.023137 | 0.162365 | 0.124622 | ZFP36L2 | 1 |
| BP | GO:1903901 | negative regulation of viral life cycle | 2023/1/17 | 26/18903 | 0.023137 | 0.162365 | 0.124622 | SNX3 | 1 |
| BP | GO:0002710 | negative regulation of T cell mediated immunity | 2023/1/17 | 27/18903 | 0.024016 | 0.162365 | 0.124622 | CLEC4G | 1 |
| BP | GO:0030325 | adrenal gland development | 2023/1/17 | 27/18903 | 0.024016 | 0.162365 | 0.124622 | CYP1B1 | 1 |
| BP | GO:0033081 | regulation of T cell differentiation in thymus | 2023/1/17 | 27/18903 | 0.024016 | 0.162365 | 0.124622 | CLEC4G | 1 |
| BP | GO:0036296 | response to increased oxygen levels | 2023/1/17 | 27/18903 | 0.024016 | 0.162365 | 0.124622 | ATP6V1A | 1 |
| BP | GO:0042537 | benzene-containing compound metabolic process | 2023/1/17 | 27/18903 | 0.024016 | 0.162365 | 0.124622 | CYP1B1 | 1 |
| BP | GO:0044342 | type B pancreatic cell proliferation | 2023/1/17 | 27/18903 | 0.024016 | 0.162365 | 0.124622 | NR4A1 | 1 |
| BP | GO:2000737 | negative regulation of stem cell differentiation | 2023/1/17 | 27/18903 | 0.024016 | 0.162365 | 0.124622 | ZFP36L2 | 1 |
| BP | GO:1903649 | regulation of cytoplasmic transport | 2023/1/17 | 28/18903 | 0.024895 | 0.165452 | 0.126991 | SNX3 | 1 |
| BP | GO:0010575 | positive regulation of vascular endothelial growth factor production | 2023/1/17 | 29/18903 | 0.025774 | 0.165452 | 0.126991 | CYP1B1 | 1 |
| BP | GO:0034698 | response to gonadotropin | 2023/1/17 | 29/18903 | 0.025774 | 0.165452 | 0.126991 | CYP1B1 | 1 |
| BP | GO:0043542 | endothelial cell migration | 2023/2/17 | 281/18903 | 0.025852 | 0.165452 | 0.126991 | NR4A1/CYP1B1 | 2 |
| BP | GO:0001975 | response to amphetamine | 2023/1/17 | 30/18903 | 0.026651 | 0.167258 | 0.128378 | NR4A1 | 1 |
| BP | GO:0017145 | stem cell division | 2023/1/17 | 31/18903 | 0.027528 | 0.167258 | 0.128378 | ZFP36L2 | 1 |
| BP | GO:0035767 | endothelial cell chemotaxis | 2023/1/17 | 31/18903 | 0.027528 | 0.167258 | 0.128378 | NR4A1 | 1 |
| BP | GO:0071295 | cellular response to vitamin | 2023/1/17 | 31/18903 | 0.027528 | 0.167258 | 0.128378 | POSTN | 1 |
| BP | GO:0046685 | response to arsenic-containing substance | 2023/1/17 | 32/18903 | 0.028404 | 0.168685 | 0.129473 | CYP1B1 | 1 |
| BP | GO:0030217 | T cell differentiation | 2023/2/17 | 296/18903 | 0.028466 | 0.168685 | 0.129473 | CLEC4G/ZFP36L2 | 2 |
| BP | GO:0007035 | vacuolar acidification | 2023/1/17 | 33/18903 | 0.029279 | 0.169325 | 0.129965 | ATP6V1A | 1 |
| BP | GO:0045577 | regulation of B cell differentiation | 2023/1/17 | 33/18903 | 0.029279 | 0.169325 | 0.129965 | ZFP36L2 | 1 |
| BP | GO:0071375 | cellular response to peptide hormone stimulus | 2023/2/17 | 306/18903 | 0.030266 | 0.170361 | 0.13076 | NR4A1/CYP1B1 | 2 |
| BP | GO:0044403 | biological process involved in symbiotic interaction | 2023/2/17 | 307/18903 | 0.030448 | 0.170361 | 0.13076 | CLEC4G/SNX3 | 2 |
| BP | GO:0007162 | negative regulation of cell adhesion | 2023/2/17 | 308/18903 | 0.030631 | 0.170361 | 0.13076 | CLEC4G/CYP1B1 | 2 |
| BP | GO:0018149 | peptide cross-linking | 2023/1/17 | 36/18903 | 0.031901 | 0.170361 | 0.13076 | F13A1 | 1 |
| BP | GO:1902105 | regulation of leukocyte differentiation | 2023/2/17 | 317/18903 | 0.032298 | 0.170361 | 0.13076 | CLEC4G/ZFP36L2 | 2 |
| BP | GO:0030198 | extracellular matrix organization | 2023/2/17 | 318/18903 | 0.032485 | 0.170361 | 0.13076 | POSTN/CYP1B1 | 2 |
| BP | GO:0019058 | viral life cycle | 2023/2/17 | 319/18903 | 0.032673 | 0.170361 | 0.13076 | CLEC4G/SNX3 | 2 |
| BP | GO:0043062 | extracellular structure organization | 2023/2/17 | 319/18903 | 0.032673 | 0.170361 | 0.13076 | POSTN/CYP1B1 | 2 |
| BP | GO:0046466 | membrane lipid catabolic process | 2023/1/17 | 37/18903 | 0.032773 | 0.170361 | 0.13076 | CYP1B1 | 1 |
| BP | GO:0045229 | external encapsulating structure organization | 2023/2/17 | 321/18903 | 0.03305 | 0.170361 | 0.13076 | POSTN/CYP1B1 | 2 |
| BP | GO:0000462 | maturation of SSU-rRNA from tricistronic rRNA transcript (SSU-rRNA, 5.8S rRNA, LSU-rRNA) | 2023/1/17 | 39/18903 | 0.034515 | 0.170361 | 0.13076 | RPS8 | 1 |
| BP | GO:0008210 | estrogen metabolic process | 2023/1/17 | 39/18903 | 0.034515 | 0.170361 | 0.13076 | CYP1B1 | 1 |
| BP | GO:0032570 | response to progesterone | 2023/1/17 | 39/18903 | 0.034515 | 0.170361 | 0.13076 | CYP1B1 | 1 |
| BP | GO:0048545 | response to steroid hormone | 2023/2/17 | 339/18903 | 0.03652 | 0.170361 | 0.13076 | ZFP36L2/CYP1B1 | 2 |
| BP | GO:0031670 | cellular response to nutrient | 2023/1/17 | 42/18903 | 0.037123 | 0.170361 | 0.13076 | POSTN | 1 |
| BP | GO:0045022 | early endosome to late endosome transport | 2023/1/17 | 42/18903 | 0.037123 | 0.170361 | 0.13076 | SNX3 | 1 |
| BP | GO:0051602 | response to electrical stimulus | 2023/1/17 | 43/18903 | 0.037991 | 0.170361 | 0.13076 | NR4A1 | 1 |
| BP | GO:0071364 | cellular response to epidermal growth factor stimulus | 2023/1/17 | 43/18903 | 0.037991 | 0.170361 | 0.13076 | ZFP36L2 | 1 |
| BP | GO:0071548 | response to dexamethasone | 2023/1/17 | 43/18903 | 0.037991 | 0.170361 | 0.13076 | CYP1B1 | 1 |
| BP | GO:0003009 | skeletal muscle contraction | 2023/1/17 | 44/18903 | 0.038858 | 0.170361 | 0.13076 | NR4A1 | 1 |
| BP | GO:0014075 | response to amine | 2023/1/17 | 44/18903 | 0.038858 | 0.170361 | 0.13076 | NR4A1 | 1 |
| BP | GO:0014911 | positive regulation of smooth muscle cell migration | 2023/1/17 | 44/18903 | 0.038858 | 0.170361 | 0.13076 | CYP1B1 | 1 |
| BP | GO:0046640 | regulation of alpha-beta T cell proliferation | 2023/1/17 | 44/18903 | 0.038858 | 0.170361 | 0.13076 | CLEC4G | 1 |
| BP | GO:0016050 | vesicle organization | 2023/2/17 | 353/18903 | 0.039314 | 0.170361 | 0.13076 | ATP6V1A/SNX3 | 2 |
| BP | GO:0008631 | intrinsic apoptotic signaling pathway in response to oxidative stress | 2023/1/17 | 45/18903 | 0.039725 | 0.170361 | 0.13076 | CYP1B1 | 1 |
| BP | GO:0046427 | positive regulation of receptor signaling pathway via JAK-STAT | 2023/1/17 | 45/18903 | 0.039725 | 0.170361 | 0.13076 | CYP1B1 | 1 |
| BP | GO:0046636 | negative regulation of alpha-beta T cell activation | 2023/1/17 | 45/18903 | 0.039725 | 0.170361 | 0.13076 | CLEC4G | 1 |
| BP | GO:0098927 | vesicle-mediated transport between endosomal compartments | 2023/1/17 | 45/18903 | 0.039725 | 0.170361 | 0.13076 | SNX3 | 1 |
| BP | GO:0046596 | regulation of viral entry into host cell | 2023/1/17 | 46/18903 | 0.04059 | 0.170361 | 0.13076 | SNX3 | 1 |
| BP | GO:0046633 | alpha-beta T cell proliferation | 2023/1/17 | 47/18903 | 0.041455 | 0.170361 | 0.13076 | CLEC4G | 1 |
| BP | GO:0070849 | response to epidermal growth factor | 2023/1/17 | 47/18903 | 0.041455 | 0.170361 | 0.13076 | ZFP36L2 | 1 |
| BP | GO:0072583 | clathrin-dependent endocytosis | 2023/1/17 | 47/18903 | 0.041455 | 0.170361 | 0.13076 | ITSN1 | 1 |
| BP | GO:0010631 | epithelial cell migration | 2023/2/17 | 366/18903 | 0.04198 | 0.170361 | 0.13076 | NR4A1/CYP1B1 | 2 |
| BP | GO:0006953 | acute-phase response | 2023/1/17 | 48/18903 | 0.042319 | 0.170361 | 0.13076 | CD163 | 1 |
| BP | GO:0045581 | negative regulation of T cell differentiation | 2023/1/17 | 48/18903 | 0.042319 | 0.170361 | 0.13076 | CLEC4G | 1 |
| BP | GO:0090132 | epithelium migration | 2023/2/17 | 369/18903 | 0.042605 | 0.170361 | 0.13076 | NR4A1/CYP1B1 | 2 |
| BP | GO:0033628 | regulation of cell adhesion mediated by integrin | 2023/1/17 | 49/18903 | 0.043183 | 0.170361 | 0.13076 | CYP1B1 | 1 |
| BP | GO:1904894 | positive regulation of receptor signaling pathway via STAT | 2023/1/17 | 49/18903 | 0.043183 | 0.170361 | 0.13076 | CYP1B1 | 1 |
| BP | GO:1901653 | cellular response to peptide | 2023/2/17 | 373/18903 | 0.043444 | 0.170361 | 0.13076 | NR4A1/CYP1B1 | 2 |
| BP | GO:0090130 | tissue migration | 2023/2/17 | 374/18903 | 0.043655 | 0.170361 | 0.13076 | NR4A1/CYP1B1 | 2 |
| BP | GO:0051452 | intracellular pH reduction | 2023/1/17 | 52/18903 | 0.045769 | 0.17717 | 0.135986 | ATP6V1A | 1 |
| BP | GO:0052372 | modulation by symbiont of entry into host | 2023/1/17 | 53/18903 | 0.046629 | 0.178657 | 0.137127 | SNX3 | 1 |
| BP | GO:0042572 | retinol metabolic process | 2023/1/17 | 54/18903 | 0.047489 | 0.178657 | 0.137127 | CYP1B1 | 1 |
| BP | GO:0030490 | maturation of SSU-rRNA | 2023/1/17 | 55/18903 | 0.048348 | 0.178657 | 0.137127 | RPS8 | 1 |
| BP | GO:0071320 | cellular response to cAMP | 2023/1/17 | 55/18903 | 0.048348 | 0.178657 | 0.137127 | CYP1B1 | 1 |
| BP | GO:0002707 | negative regulation of lymphocyte mediated immunity | 2023/1/17 | 56/18903 | 0.049207 | 0.178657 | 0.137127 | CLEC4G | 1 |
| BP | GO:0050832 | defense response to fungus | 2023/1/17 | 56/18903 | 0.049207 | 0.178657 | 0.137127 | COTL1 | 1 |
| CC | GO:0022627 | cytosolic small ribosomal subunit | 2023/2/17 | 45/19869 | 0.000668 | 0.042723 | 0.025296 | RPS8/UBA52 | 2 |
| CC | GO:0015935 | small ribosomal subunit | 2023/2/17 | 77/19869 | 0.001941 | 0.057156 | 0.033842 | RPS8/UBA52 | 2 |
| CC | GO:0030139 | endocytic vesicle | 2023/3/17 | 343/19869 | 0.002897 | 0.057156 | 0.033842 | CD163/UBA52/SNX3 | 3 |
| CC | GO:0022626 | cytosolic ribosome | 2023/2/17 | 105/19869 | 0.003572 | 0.057156 | 0.033842 | RPS8/UBA52 | 2 |
| CC | GO:0009897 | external side of plasma membrane | 2023/3/17 | 462/19869 | 0.006663 | 0.067666 | 0.040066 | CLEC4G/CD163/CLEC10A | 3 |
| CC | GO:0000221 | vacuolar proton-transporting V-type ATPase, V1 domain | 2023/1/17 | 11/19869 | 0.009374 | 0.067666 | 0.040066 | ATP6V1A | 1 |
| CC | GO:0033180 | proton-transporting V-type ATPase, V1 domain | 2023/1/17 | 11/19869 | 0.009374 | 0.067666 | 0.040066 | ATP6V1A | 1 |
| CC | GO:0030904 | retromer complex | 2023/1/17 | 12/19869 | 0.010222 | 0.067666 | 0.040066 | SNX3 | 1 |
| CC | GO:0032009 | early phagosome | 2023/1/17 | 12/19869 | 0.010222 | 0.067666 | 0.040066 | SNX3 | 1 |
| CC | GO:0044391 | ribosomal subunit | 2023/2/17 | 188/19869 | 0.011032 | 0.067666 | 0.040066 | RPS8/UBA52 | 2 |
| CC | GO:0030666 | endocytic vesicle membrane | 2023/2/17 | 194/19869 | 0.011714 | 0.067666 | 0.040066 | CD163/UBA52 | 2 |
| CC | GO:0030027 | lamellipodium | 2023/2/17 | 203/19869 | 0.012771 | 0.067666 | 0.040066 | APBB1IP/ITSN1 | 2 |
| CC | GO:0030136 | clathrin-coated vesicle | 2023/2/17 | 211/19869 | 0.013745 | 0.067666 | 0.040066 | ATP6V1A/SNX3 | 2 |
| CC | GO:0033178 | proton-transporting two-sector ATPase complex, catalytic domain | 2023/1/17 | 19/19869 | 0.016139 | 0.070187 | 0.041558 | ATP6V1A | 1 |
| CC | GO:0005840 | ribosome | 2023/2/17 | 232/19869 | 0.01645 | 0.070187 | 0.041558 | RPS8/UBA52 | 2 |
| CC | GO:0016471 | vacuolar proton-transporting V-type ATPase complex | 2023/1/17 | 25/19869 | 0.021185 | 0.084738 | 0.050174 | ATP6V1A | 1 |
| CC | GO:0033176 | proton-transporting V-type ATPase complex | 2023/1/17 | 27/19869 | 0.022861 | 0.086065 | 0.050959 | ATP6V1A | 1 |
| CC | GO:0030135 | coated vesicle | 2023/2/17 | 310/19869 | 0.028279 | 0.0951 | 0.056309 | ATP6V1A/SNX3 | 2 |
| CC | GO:0034774 | secretory granule lumen | 2023/2/17 | 322/19869 | 0.030332 | 0.0951 | 0.056309 | F13A1/COTL1 | 2 |
| CC | GO:0060205 | cytoplasmic vesicle lumen | 2023/2/17 | 325/19869 | 0.030854 | 0.0951 | 0.056309 | F13A1/COTL1 | 2 |
| CC | GO:0031983 | vesicle lumen | 2023/2/17 | 327/19869 | 0.031205 | 0.0951 | 0.056309 | F13A1/COTL1 | 2 |
| CC | GO:0016469 | proton-transporting two-sector ATPase complex | 2023/1/17 | 50/19869 | 0.041946 | 0.110803 | 0.065607 | ATP6V1A | 1 |
| CC | GO:0005769 | early endosome | 2023/2/17 | 414/19869 | 0.047927 | 0.110803 | 0.065607 | PTP4A2/SNX3 | 2 |
| CC | GO:0005765 | lysosomal membrane | 2023/2/17 | 418/19869 | 0.048761 | 0.110803 | 0.065607 | ATP6V1A/UBA52 | 2 |
| CC | GO:0098852 | lytic vacuole membrane | 2023/2/17 | 418/19869 | 0.048761 | 0.110803 | 0.065607 | ATP6V1A/UBA52 | 2 |
| CC | GO:0022625 | cytosolic large ribosomal subunit | 2023/1/17 | 59/19869 | 0.049318 | 0.110803 | 0.065607 | UBA52 | 1 |
| CC | GO:0031252 | cell leading edge | 2023/2/17 | 421/19869 | 0.049391 | 0.110803 | 0.065607 | APBB1IP/ITSN1 | 2 |
| CC | GO:0005925 | focal adhesion | 2023/2/17 | 422/19869 | 0.049601 | 0.110803 | 0.065607 | APBB1IP/RPS8 | 2 |
| MF | GO:0020037 | heme binding | 2023/2/18 | 139/18432 | 0.007982 | 0.110724 | 0.076753 | BACH1/CYP1B1 | 2 |
| MF | GO:0046906 | tetrapyrrole binding | 2023/2/18 | 149/18432 | 0.009123 | 0.110724 | 0.076753 | BACH1/CYP1B1 | 2 |
| MF | GO:0003735 | structural constituent of ribosome | 2023/2/18 | 176/18432 | 0.012546 | 0.110724 | 0.076753 | RPS8/UBA52 | 2 |
| MF | GO:0031386 | protein tag | 2023/1/18 | 13/18432 | 0.012625 | 0.110724 | 0.076753 | UBA52 | 1 |
| MF | GO:0035259 | nuclear glucocorticoid receptor binding | 2023/1/18 | 13/18432 | 0.012625 | 0.110724 | 0.076753 | NR4A1 | 1 |
| MF | GO:0016755 | aminoacyltransferase activity | 2023/1/18 | 17/18432 | 0.01648 | 0.110724 | 0.076753 | F13A1 | 1 |
| MF | GO:0046933 | proton-transporting ATP synthase activity, rotational mechanism | 2023/1/18 | 17/18432 | 0.01648 | 0.110724 | 0.076753 | ATP6V1A | 1 |
| MF | GO:0070064 | proline-rich region binding | 2023/1/18 | 17/18432 | 0.01648 | 0.110724 | 0.076753 | ITSN1 | 1 |
| MF | GO:0010314 | phosphatidylinositol-5-phosphate binding | 2023/1/18 | 19/18432 | 0.018401 | 0.110724 | 0.076753 | SNX3 | 1 |
| MF | GO:0005537 | mannose binding | 2023/1/18 | 22/18432 | 0.021278 | 0.110724 | 0.076753 | CLEC4G | 1 |
| MF | GO:0015252 | proton channel activity | 2023/1/18 | 24/18432 | 0.02319 | 0.110724 | 0.076753 | ATP6V1A | 1 |
| MF | GO:0042625 | ATPase-coupled ion transmembrane transporter activity | 2023/1/18 | 24/18432 | 0.02319 | 0.110724 | 0.076753 | ATP6V1A | 1 |
| MF | GO:0044769 | ATPase activity, coupled to transmembrane movement of ions, rotational mechanism | 2023/1/18 | 24/18432 | 0.02319 | 0.110724 | 0.076753 | ATP6V1A | 1 |
| MF | GO:0046961 | proton-transporting ATPase activity, rotational mechanism | 2023/1/18 | 24/18432 | 0.02319 | 0.110724 | 0.076753 | ATP6V1A | 1 |
| MF | GO:0030247 | polysaccharide binding | 2023/1/18 | 25/18432 | 0.024146 | 0.110724 | 0.076753 | CLEC4G | 1 |
| MF | GO:0070330 | aromatase activity | 2023/1/18 | 25/18432 | 0.024146 | 0.110724 | 0.076753 | CYP1B1 | 1 |
| MF | GO:0035925 | mRNA 3'-UTR AU-rich region binding | 2023/1/18 | 26/18432 | 0.0251 | 0.110724 | 0.076753 | ZFP36L2 | 1 |
| MF | GO:0009678 | pyrophosphate hydrolysis-driven proton transmembrane transporter activity | 2023/1/18 | 27/18432 | 0.026053 | 0.110724 | 0.076753 | ATP6V1A | 1 |
| MF | GO:0080025 | phosphatidylinositol-3,5-bisphosphate binding | 2023/1/18 | 27/18432 | 0.026053 | 0.110724 | 0.076753 | SNX3 | 1 |
| MF | GO:0070273 | phosphatidylinositol-4-phosphate binding | 2023/1/18 | 28/18432 | 0.027006 | 0.110724 | 0.076753 | SNX3 | 1 |
| MF | GO:0030246 | carbohydrate binding | 2023/2/18 | 275/18432 | 0.028995 | 0.113219 | 0.078483 | CLEC4G/CLEC10A | 2 |
| MF | GO:0008395 | steroid hydroxylase activity | 2023/1/18 | 38/18432 | 0.036483 | 0.135981 | 0.094262 | CYP1B1 | 1 |
| MF | GO:0016712 | oxidoreductase activity, acting on paired donors, with incorporation or reduction of molecular oxygen, reduced flavin or flavoprotein as one donor, and incorporation of one atom of oxygen | 2023/1/18 | 40/18432 | 0.038368 | 0.136789 | 0.094822 | CYP1B1 | 1 |
| MF | GO:0008138 | protein tyrosine/serine/threonine phosphatase activity | 2023/1/18 | 44/18432 | 0.042127 | 0.141252 | 0.097915 | PTP4A2 | 1 |
| MF | GO:0032266 | phosphatidylinositol-3-phosphate binding | 2023/1/18 | 45/18432 | 0.043065 | 0.141252 | 0.097915 | SNX3 | 1 |
| MF | GO:0005044 | scavenger receptor activity | 2023/1/18 | 47/18432 | 0.044937 | 0.141725 | 0.098243 | CD163 | 1 |
| MF | GO:0004879 | nuclear receptor activity | 2023/1/18 | 52/18432 | 0.049604 | 0.142891 | 0.099052 | NR4A1 | 1 |
| MF | GO:0098531 | ligand-activated transcription factor activity | 2023/1/18 | 52/18432 | 0.049604 | 0.142891 | 0.099052 | NR4A1 | 1 |

**Supplementary Table 2:** The list of Kyoto Encyclopedia of Genes and Genomes (KEGG) enrichment analysis of candidate genes.

| **ID** | **Description** | **GeneRatio** | **BgRatio** | **pvalue** | **p.adjust** | **qvalue** | **geneID** | **Count** |
| --- | --- | --- | --- | --- | --- | --- | --- | --- |
| hsa05171 | Coronavirus disease - COVID-19 | 2023/3/9 | 232/8577 | 0.001454 | 0.001454 | 0.047461 | F13A1/RPS8/UBA52 | 3 |
| hsa03010 | Ribosome | 2023/2/9 | 167/8577 | 0.012401 | 0.012401 | 0.198218 | RPS8/UBA52 | 2 |
| hsa04966 | Collecting duct acid secretion | 2023/1/9 | 27/8577 | 0.02799 | 0.02799 | 0.198218 | ATP6V1A | 1 |
| hsa00380 | Tryptophan metabolism | 2023/1/9 | 42/8577 | 0.043238 | 0.043238 | 0.198218 | CYP1B1 | 1 |
| hsa05110 | Vibrio cholerae infection | 2023/1/9 | 50/8577 | 0.051282 | 0.051282 | 0.198218 | ATP6V1A | 1 |
| hsa04913 | Ovarian steroidogenesis | 2023/1/9 | 51/8577 | 0.052284 | 0.052284 | 0.198218 | CYP1B1 | 1 |
| hsa00140 | Steroid hormone biosynthesis | 2023/1/9 | 62/8577 | 0.063237 | 0.063237 | 0.198218 | CYP1B1 | 1 |
| hsa04927 | Cortisol synthesis and secretion | 2023/1/9 | 65/8577 | 0.066204 | 0.066204 | 0.198218 | NR4A1 | 1 |
| hsa05204 | Chemical carcinogenesis - DNA adducts | 2023/1/9 | 69/8577 | 0.070148 | 0.070148 | 0.198218 | CYP1B1 | 1 |
| hsa05120 | Epithelial cell signaling in Helicobacter pylori infection | 2023/1/9 | 70/8577 | 0.071132 | 0.071132 | 0.198218 | ATP6V1A | 1 |
| hsa04137 | Mitophagy - animal | 2023/1/9 | 72/8577 | 0.073096 | 0.073096 | 0.198218 | UBA52 | 1 |
| hsa00980 | Metabolism of xenobiotics by cytochrome P450 | 2023/1/9 | 78/8577 | 0.078967 | 0.078967 | 0.198218 | CYP1B1 | 1 |
| hsa04721 | Synaptic vesicle cycle | 2023/1/9 | 78/8577 | 0.078967 | 0.078967 | 0.198218 | ATP6V1A | 1 |
| hsa04610 | Complement and coagulation cascades | 2023/1/9 | 86/8577 | 0.086744 | 0.086744 | 0.200481 | F13A1 | 1 |
| hsa05323 | Rheumatoid arthritis | 2023/1/9 | 93/8577 | 0.093501 | 0.093501 | 0.200481 | ATP6V1A | 1 |
| hsa04925 | Aldosterone synthesis and secretion | 2023/1/9 | 98/8577 | 0.0983 | 0.0983 | 0.200481 | NR4A1 | 1 |
| hsa04611 | Platelet activation | 2023/1/9 | 124/8577 | 0.122893 | 0.122893 | 0.216138 | APBB1IP | 1 |
| hsa00190 | Oxidative phosphorylation | 2023/1/9 | 134/8577 | 0.132192 | 0.132192 | 0.216138 | ATP6V1A | 1 |
| hsa04120 | Ubiquitin mediated proteolysis | 2023/1/9 | 142/8577 | 0.139568 | 0.139568 | 0.216138 | UBA52 | 1 |
| hsa04145 | Phagosome | 2023/1/9 | 152/8577 | 0.14871 | 0.14871 | 0.216138 | ATP6V1A | 1 |
| hsa04934 | Cushing syndrome | 2023/1/9 | 155/8577 | 0.151435 | 0.151435 | 0.216138 | NR4A1 | 1 |
| hsa04150 | mTOR signaling pathway | 2023/1/9 | 156/8577 | 0.152342 | 0.152342 | 0.216138 | ATP6V1A | 1 |
| hsa04218 | Cellular senescence | 2023/1/9 | 156/8577 | 0.152342 | 0.152342 | 0.216138 | ZFP36L2 | 1 |
| hsa05167 | Kaposi sarcoma-associated herpesvirus infection | 2023/1/9 | 194/8577 | 0.186169 | 0.186169 | 0.253124 | UBA52 | 1 |
| hsa04015 | Rap1 signaling pathway | 2023/1/9 | 210/8577 | 0.200049 | 0.200049 | 0.253232 | APBB1IP | 1 |
| hsa05207 | Chemical carcinogenesis - receptor activation | 2023/1/9 | 212/8577 | 0.201769 | 0.201769 | 0.253232 | CYP1B1 | 1 |
| hsa05208 | Chemical carcinogenesis - reactive oxygen species | 2023/1/9 | 223/8577 | 0.211171 | 0.211171 | 0.255216 | CYP1B1 | 1 |
| hsa05131 | Shigellosis | 2023/1/9 | 247/8577 | 0.231344 | 0.231344 | 0.263115 | UBA52 | 1 |
| hsa04144 | Endocytosis | 2023/1/9 | 250/8577 | 0.233833 | 0.233833 | 0.263115 | SNX3 | 1 |
| hsa05012 | Parkinson disease | 2023/1/9 | 266/8577 | 0.246987 | 0.246987 | 0.268653 | UBA52 | 1 |
| hsa04010 | MAPK signaling pathway | 2023/1/9 | 301/8577 | 0.275065 | 0.275065 | 0.287701 | NR4A1 | 1 |
| hsa05206 | MicroRNAs in cancer | 2023/1/9 | 310/8577 | 0.282132 | 0.282132 | 0.287701 | CYP1B1 | 1 |
| hsa05165 | Human papillomavirus infection | 2023/1/9 | 331/8577 | 0.298386 | 0.298386 | 0.295055 | ATP6V1A | 1 |
| hsa04151 | PI3K-Akt signaling pathway | 2023/1/9 | 359/8577 | 0.319549 | 0.319549 | 0.306688 | NR4A1 | 1 |
| hsa05022 | Pathways of neurodegeneration - multiple diseases | 2023/1/9 | 476/8577 | 0.401972 | 0.401972 | 0.374771 | UBA52 | 1 |

**Supplementary Table 3:** The results of KEGG enrichment analysis of NR4A1.

| **ID** | **Description** | **setSize** | **enrichmentScore** | **NES** | **pvalue** | **p.adjust** | **qvalue** | **rank** | **leading_edge** | **core_enrichment** |
| --- | --- | --- | --- | --- | --- | --- | --- | --- | --- | --- |
| KEGG_OLFACTORY_TRANSDUCTION | KEGG_OLFACTORY_TRANSDUCTION | 352 | -0.52967 | -2.10106 | 1.00E-10 | 1.36E-08 | 1.23E-08 | 5104 | tags=58%, list=29%, signal=42% | OR4C12/OR13J1/OR11H1/OR5A2/OR2A7/OR2T1/OR51E1/OR2K2/OR52M1/GUCA1C/OR6F1/OR13C4/OR11G2/OR8H3/OR8J3/OR8K5/OR2C3/OR51B4/OR4D6/OR9K2/OR10H5/OR5A1/OR9Q1/OR2J3/OR1J1/OR8H1/OR2A2/OR13G1/OR8B8/OR8H2/OR10H3/OR5D14/OR10G4/OR4C3/OR8J1/OR4C11/OR8G5/OR51A4/OR1N1/OR6B3/OR5M10/OR5H6/OR2W1/OR5M1/OR10H4/OR5AP2/OR2Z1/OR51A7/OR2T29/PDE1C/OR51I2/OR4D5/OR7A17/OR4F15/OR51S1/OR5M9/OR1M1/OR11H4/OR2B2/OR3A1/OR5D18/OR52E8/OR9G1/GUCY2D/OR8K1/OR2T3/OR1L3/OR2M5/OR2T6/OR10H2/OR3A2/OR52B2/OR5L2/OR1A2/CNGB1/OR2H2/OR9I1/OR52A1/OR5T2/OR2H1/OR2D3/OR5B3/OR13C5/OR10G2/OR10J1/OR5B21/OR2T8/OR10T2/OR11A1/OR6C68/OR5AC2/OR4K14/OR51F2/OR4D10/OR6C4/OR4E2/OR5P3/OR4D9/OR52I2/OR7C2/OR2V2/OR2F2/OR2L2/OR1Q1/OR10A2/OR2D2/OR2G3/OR10G7/OR10G8/OR51M1/OR51Q1/CAMK2B/OR56A5/OR4B1/OR52K1/OR2T2/OR52I1/OR6X1/OR2AK2/GUCA1A/OR2T4/OR6A2/OR4L1/CAMK2A/OR5V1/OR2M4/OR51G2/OR5AU1/OR51V1/OR52A5/OR4N5/OR10AD1/OR2L3/OR7A5/OR6N1/OR5T1/OR6K2/OR6C74/OR3A3/OR7C1/OR10K1/OR5AN1/OR2W3/OR52J3/OR4K13/OR6K3/OR4K1/OR10Q1/OR2B6/OR4D1/OR2A25/OR5AS1/OR8I2/OR7D2/OR2A12/OR1E2/OR7G2/OR10G3/OR10Z1/OR6C75/OR1D2/OR4K15/OR6C3/OR2M2/OR2M7/OR4N2/OR4K5/OR2A5/OR2A14/OR8A1/OR8D4/OR10AG1/OR1L8/OR9Q2/OR2M3/OR2T33/OR12D3/OR1A1/OR4P4/OR6C1/OR6Y1/OR8B12/OR4C15/OR1I1/OR52N1/OR6N2/OR10K2/OR2T12/OR4D2/OR4M1/OR9A4/OR4K17/PRKG2/OR52N5/OR51D1/CNGA3/OR2AG2/OR56A1/OR56B1/OR4K2/OR5I1/OR51L1/OR14J1/CLCA1 |
| KEGG_NEUROACTIVE_LIGAND_RECEPTOR_INTERACTION | KEGG_NEUROACTIVE_LIGAND_RECEPTOR_INTERACTION | 270 | -0.45882 | -1.7946 | 1.50E-10 | 1.36E-08 | 1.23E-08 | 4872 | tags=53%, list=27%, signal=39% | HRH4/AVPR1A/GABBR2/MAS1/MLNR/ADORA3/MC3R/CHRNA4/GRM5/GCGR/TAAR1/F2/GRM6/TACR3/ADRA1A/TAAR6/CNR2/F2RL2/GABRR1/TAAR2/UTS2R/RXFP2/GLRA1/NMUR2/ADRA1B/OPRL1/PRLHR/PTGER1/ADRA1D/PTGER3/CNR1/PTAFR/GABRB1/CHRND/GRIN2B/NPFFR1/DRD1/LTB4R/GABRB3/GH2/LPAR1/NTSR1/EDNRB/PRSS1/PTGER2/P2RY8/GRM1/P2RX2/GPR50/CYSLTR2/GABRG3/NPY2R/CCKBR/GRIA3/GH1/GABRD/S1PR5/MTNR1B/GZMA/CHRNA5/MCHR1/GHRHR/AGTR2/RXFP1/S1PR3/HTR1A/OPRK1/FSHB/OPRD1/HRH1/GABRA2/BDKRB1/PTH1R/ADORA2B/GHR/HRH2/C5AR1/HRH3/HTR7/PLG/LEPR/HTR1F/CHRNB4/GLP2R/GABRA1/P2RY13/CYSLTR1/GLRA3/GRIA1/GPR156/GRIN3A/MC2R/CHRM5/HTR2C/GABRP/PRL/CHRNA1/ADORA1/LEP/GRIA4/GABRA4/CHRNA7/GABRA6/TRHR/GRM8/BDKRB2/GRID2/C3AR1/GLRA2/LHCGR/HTR1E/HTR4/SSTR2/CHRM2/OPRM1/GRM3/FPR1/DRD3/GABRB2/GABRQ/GNRHR/GRIK1/GALR1/HTR2A/P2RY14/ADRA2C/NPBWR2/P2RY6/GABRR2/PTGFR/S1PR4/HTR5A/GPR83/CALCR/P2RX3/GABRG1/GABRA3/GRM4/FPR2/HCRTR2/GRM7/GABRG2/OXTR |
| KEGG_NOTCH_SIGNALING_PATHWAY | KEGG_NOTCH_SIGNALING_PATHWAY | 47 | 0.442579 | 1.980819 | 0.000643 | 0.024918 | 0.022606 | 3472 | tags=47%, list=19%, signal=38% | DTX4/KAT2A/NOTCH3/DTX2/MAML3/NCOR2/CTBP2/HES1/DLL4/LFNG/JAG2/NOTCH1/PTCRA/NCSTN/CTBP1/JAG1/DLL1/HDAC1/CREBBP/DVL1/PSENEN/NOTCH4 |
| KEGG_DRUG_METABOLISM_OTHER_ENZYMES | KEGG_DRUG_METABOLISM_OTHER_ENZYMES | 49 | -0.51263 | -1.70751 | 0.000428 | 0.024918 | 0.022606 | 4967 | tags=53%, list=28%, signal=38% | UGT2A1/UGT1A6/UGT2B15/UGT2B11/UGT2B28/CES5A/UGT2B4/UGT1A4/UCK2/UGT1A8/UGT1A7/UGT1A10/NAT2/CYP3A43/CYP3A7/UPP1/UPP2/UGT2B10/UGT2A3/UGT1A1/DPYD/DPYS/NAT1/CYP3A4/CDA/CYP2A6 |
| KEGG_RETINOL_METABOLISM | KEGG_RETINOL_METABOLISM | 62 | -0.48338 | -1.66191 | 0.000688 | 0.024918 | 0.022606 | 5049 | tags=53%, list=28%, signal=38% | DGAT2/UGT2A1/CYP1A1/UGT1A6/UGT2B15/CYP2B6/ADH1C/CYP4A11/UGT2B11/AWAT2/UGT2B28/ADH1B/ADH4/ALDH1A2/UGT2B4/UGT1A4/CYP1A2/CYP26C1/UGT1A8/UGT1A7/UGT1A10/CYP3A43/CYP3A7/DHRS9/BCO1/DHRS4/UGT2B10/UGT2A3/UGT1A1/CYP3A4/ADH6/CYP4A22/CYP2A6 |
| KEGG_CIRCADIAN_RHYTHM_MAMMAL | KEGG_CIRCADIAN_RHYTHM_MAMMAL | 12 | 0.690391 | 2.147208 | 0.001456 | 0.043923 | 0.039849 | 1899 | tags=50%, list=11%, signal=45% | PER1/CRY2/CSNK1D/BHLHE40/CSNK1E/PER2 |
| KEGG_STARCH_AND_SUCROSE_METABOLISM | KEGG_STARCH_AND_SUCROSE_METABOLISM | 48 | -0.4976 | -1.64558 | 0.001808 | 0.046758 | 0.04242 | 5923 | tags=56%, list=33%, signal=38% | GBE1/AMY1C/GCK/PGM1/ENPP1/UGT2A1/UGT1A6/UGT2B15/AMY2A/MGAM/UGT2B11/UGT2B28/UGT2B4/UGT1A4/UGT1A8/UGT1A7/UGT1A10/PYGL/UGT2B10/UGT2A3/PGM2/UGT1A1/AMY2B/SI/G6PC2/GYS2/HK3 |

**Supplementary Table 4:** The results of KEGG enrichment analysis of CLEC4G.

| **ID** | **Description** | **setSize** | **enrichmentScore** | **NES** | **pvalue** | **p.adjust** | **qvalue** | **rank** | **leading_edge** | **core_enrichment** |
| --- | --- | --- | --- | --- | --- | --- | --- | --- | --- | --- |
| KEGG_OLFACTORY_TRANSDUCTION | KEGG_OLFACTORY_TRANSDUCTION | 352 | 0.551547 | 2.035708 | 1.00E-10 | 9.05E-09 | 8.53E-09 | 6161 | tags=70%, list=34%, signal=47% | OR6N2/OR9A4/OR14J1/OR1I1/OR2M3/CLCA1/OR51L1/OR8A1/OR5I1/OR4K2/OR4M1/CNGA3/OR5AN1/OR56A1/OR10G3/OR2T33/OR56B1/OR7C1/OR8D4/OR51D1/OR5AU1/OR4N2/OR52N5/CAMK2A/OR2AG2/OR1L8/OR4K17/OR2A5/PRKG2/OR2T12/OR10K2/OR4K1/OR51E1/OR2V2/OR3A3/OR4D2/OR6K2/OR52N1/OR4E2/OR6C4/OR4C15/OR7A5/OR2L3/OR6Y1/OR6C1/OR11A1/OR1A1/OR12D3/OR52I2/OR8B12/OR5V1/CAMK2B/OR10AG1/OR8B8/OR52I1/OR10A2/OR5A2/OR9Q2/OR4K5/OR4P4/OR2M7/OR2M2/OR6C3/OR8G1/OR4K15/OR2T8/OR1D2/OR4D9/OR10Z1/OR8H2/OR1E2/OR2L2/OR5A1/OR52A1/OR6C75/OR2D2/OR8I2/PDC/OR5L2/OR7G2/OR5AS1/OR2A25/OR4D1/OR10H5/OR7D2/GUCY2D/OR10Q1/OR6K3/OR1N2/OR2A2/OR13A1/OR9G1/OR5D18/OR4K13/OR2A14/OR52J3/OR2T6/OR2W3/OR10K1/OR51A7/OR6C74/OR5T1/OR51A4/OR6N1/OR2B6/OR10H4/OR4N5/OR2J3/OR52A5/OR51V1/OR9Q1/OR51G2/OR2M4/OR2C3/OR4L1/OR2T4/OR11G2/OR2A12/OR2AK2/OR6X1/OR4C46/OR2T2/OR4B1/OR56A5/OR5K1/CNGB1/OR6A2/OR52K1/OR2G3/OR4C12/OR1Q1/OR51Q1/GUCA1A/OR2F2/OR2AT4/OR7C2/OR4D10/OR51F2/OR4K14/OR5AC2/OR6C68/OR10T2/OR10G8/OR10G7/OR51M1/OR5B21/OR10G2/OR13C5/OR5B3/OR2D3/OR2A7/OR2H1/OR5T2/PDE1C/OR10A5/OR1A2/OR7D4/OR52B2/OR3A2/OR1J2/OR5P3/OR10H2/OR2M5/OR6M1/OR10AD1/OR1L3/OR2T3/OR5M8/OR1S2/OR10J1/OR52E8/OR3A1/OR2B2/OR11H4/OR9I1/OR1M1/OR5M9/OR51S1/OR4F15/OR7A17/OR4D5/OR8K1/OR2B11/OR2T29/OR2Z1/OR5AP2/OR5M1/OR2W1/OR5H6/OR5M10/OR2H2/OR6B3/OR8G5/OR4C11/OR8J1/OR4C3/OR5D14/PRKG1/OR13G1/OR13C9/OR52N4/OR1J1/OR2G6/OR9K2/OR4D6/OR10G4/OR13J1/OR8K5/OR10H3/OR8H3/OR8H1/OR13C4/OR6F1/OR51B4/OR52M1/OR2K2/OR8J3/OR2T1/OR51I2/OR11H1/OR1N1/GUCA1C/OR56A4/OR8D1/OR5B12/OR6C65/OR51I1/PRKACB/OR13C8/OR52E4/OR2AE1/OR7G1/PRKACA/OR14A16/OR10R2/OR4A5/OR7G3/PRKACG/OR6C70/OR14C36/OR10A3/OR1L6/OR4F6/OR5P2/OR2T34/OR4F5 |
| KEGG_NEUROACTIVE_LIGAND_RECEPTOR_INTERACTION | KEGG_NEUROACTIVE_LIGAND_RECEPTOR_INTERACTION | 270 | 0.499622 | 1.829432 | 1.00E-10 | 9.05E-09 | 8.53E-09 | 4194 | tags=49%, list=23%, signal=38% | FPR2/FPR1/GRM4/GABRG2/GRIK1/CALCR/HTR4/HCRTR2/GABRB2/GABRA4/GABRR2/PLG/GABRA1/GABRG1/DRD3/GRM8/GRIA1/GABRA3/SSTR2/HTR5A/OPRM1/P2RX3/ADRA1A/GRIN2B/OXTR/GRM7/GHRHR/HTR2C/GPR83/GABRA2/PTH1R/GLRA3/LEPR/HRH2/CHRNA1/GRM1/P2RY8/CYSLTR2/NPBWR2/P2RY14/HTR2A/ADRA2C/OPRD1/CHRNB4/PTGFR/GABRQ/GRM3/RXFP1/MCHR1/HTR1E/GLRA2/GRID2/HTR7/NPFFR1/GALR1/LHCGR/GABRA6/ADRA1D/TRHR/GNRHR/CHRM2/PRL/CHRNA7/GRIA4/LEP/NPY2R/ADORA1/GRIA3/C3AR1/P2RY6/MC2R/HRH1/P2RY13/LPAR4/AVPR1A/GABBR2/S1PR4/GLP2R/GABRD/P2RX1/F2/GABRA5/CHRM5/DRD1/BDKRB1/EDNRB/HTR1F/PRLHR/ADRA1B/FSHB/RXFP2/HRH3/GABRR1/OPRK1/HTR1A/GLRA1/GRIN3A/AGTR2/P2RX2/VIPR2/FPR3/HTR2B/GRM5/ADORA2B/GABRG3/GRIN2A/GRID1/GABRB3/CHRNA4/GH1/GHR/CCKBR/GPR156/GLRB/BDKRB2/PTGER3/GPR50/CHRNA6/ADORA3/F2RL2/MCHR2/HTR1D/GZMA/MTNR1B/GRPR/ADCYAP1R1/GH2/PTGER2/AGTR1/NTSR1/CHRNA5 |
| KEGG_NOTCH_SIGNALING_PATHWAY | KEGG_NOTCH_SIGNALING_PATHWAY | 47 | -0.46394 | -2.24463 | 1.82E-05 | 0.001096 | 0.001032 | 2406 | tags=40%, list=13%, signal=35% | DVL2/CTBP1/DVL1/PSENEN/JAG1/DLL4/PTCRA/LFNG/MAML3/DLL1/NOTCH1/NCOR2/JAG2/CTBP2/HES1/DTX4/DTX2/KAT2A/NOTCH3 |
| KEGG_CIRCADIAN_RHYTHM_MAMMAL | KEGG_CIRCADIAN_RHYTHM_MAMMAL | 12 | -0.73981 | -2.3966 | 0.000275 | 0.012456 | 0.011735 | 1523 | tags=50%, list=9%, signal=46% | PER2/CSNK1E/CRY2/CSNK1D/BHLHE40/PER1 |
| KEGG_HEMATOPOIETIC_CELL_LINEAGE | KEGG_HEMATOPOIETIC_CELL_LINEAGE | 85 | 0.469448 | 1.601055 | 0.000598 | 0.021637 | 0.020385 | 4584 | tags=44%, list=26%, signal=33% | CD33/CR1/ITGAM/CD38/IL5RA/ITGA4/CR2/IL1R2/CD1D/IL1B/CD36/EPO/MME/CD4/IL1A/CSF3R/IL2RA/CD1B/GYPA/IL6/CD8A/CD8B/MS4A1/CD1A/CD3E/IL5/TNF/IL9R/DNTT/THPO/FCGR1A/CSF2RA/ITGA2B/TPO/CD1E/IL7/GP9 |
| KEGG_CALCIUM_SIGNALING_PATHWAY | KEGG_CALCIUM_SIGNALING_PATHWAY | 177 | 0.394478 | 1.414171 | 0.00134 | 0.034647 | 0.032642 | 3719 | tags=33%, list=21%, signal=27% | SLC8A1/HTR4/CD38/PRKCG/MYLK2/PLCZ1/HTR5A/NOS1/P2RX3/ADRA1A/CAMK2A/OXTR/CAMK4/HTR2C/PDE1B/SLC8A2/HRH2/GRM1/CYSLTR2/HTR2A/PTGFR/CACNA1S/ATP2B2/PRKCB/CAMK2B/HTR7/CACNA1A/LHCGR/ADRA1D/ATP2B3/SLC8A3/TRHR/CHRM2/CACNA1F/CHRNA7/HRH1/CACNA1B/AVPR1A/P2RX1/PPP3R2/CACNA1G/CHRM5/DRD1/BDKRB1/EDNRB/PLN/ADRA1B/MYLK3/P2RX2/RYR3/NOS2/HTR2B/GRM5/ADORA2B/GRIN2A/CCKBR/BDKRB2/PTGER3/PDE1C |
| KEGG_CYTOKINE_CYTOKINE_RECEPTOR_INTERACTION | KEGG_CYTOKINE_CYTOKINE_RECEPTOR_INTERACTION | 261 | 0.373667 | 1.366101 | 0.001299 | 0.034647 | 0.032642 | 5836 | tags=44%, list=33%, signal=30% | CCL18/IL10/AMHR2/TNFSF8/IL5RA/PPBP/IL1R2/IL12RB1/IL22RA2/CXCR1/IL1B/CCR1/CCL11/CCL25/HGF/TNFSF11/CXCR2/IL22/EPO/CCL3L3/IL10RA/IL21/LEPR/TNFSF14/OSM/IFNA1/IL1A/PF4/BMPR1B/XCR1/CCR2/TNFRSF9/TNFRSF8/CCR5/CSF3R/PRL/CNTF/TNFRSF10C/LEP/CRLF2/IL2RA/CCR3/CX3CR1/IFNA21/FASLG/IFNA4/TNFSF4/IL1RAP/XCL2/CCL7/CXCL8/IL6/MPL/IL2/CSF2RB/CCR4/IL21R/CXCL5/IL2RG/CXCL13/IL18R1/INHBE/INHBC/IL12B/TNFSF15/IL5/TNF/GH1/IL22RA1/GHR/IFNA16/IL9R/IL23R/CXCL12/TGFBR1/CCL23/CSF2RA/ACVR2B/CCL2/CXCR5/CCL1/GH2/TNFRSF13B/TPO/IFNK/IFNG/IL7/IL15/XCL1/CXCL9/CCR7/IL20/CCL20/IL17A/CCL26/IL24/IL10RB/IL7R/PF4V1/IL19/FAS/TNFRSF11B/IFNA17/PDGFRA/IFNL2/FLT3/IL12RB2/PRLR/TNFRSF17/CCL16/IFNL3/CCR8/INHBA/IL26 |

**Supplementary Table 5:** The results of KEGG enrichment analysis of CD163.

| **ID** | **Description** | **setSize** | **enrichmentScore** | **NES** | **pvalue** | **p.adjust** | **qvalue** | **rank** | **leading_edge** | **core_enrichment** |
| --- | --- | --- | --- | --- | --- | --- | --- | --- | --- | --- |
| KEGG_OLFACTORY_TRANSDUCTION | KEGG_OLFACTORY_TRANSDUCTION | 352 | 0.536572 | 1.994077 | 1.00E-10 | 8.75E-09 | 8.05E-09 | 6447 | tags=73%, list=36%, signal=48% | OR7C1/OR56A1/OR6N2/OR8A1/OR2M3/OR4D9/OR14J1/OR2M2/OR2T33/OR8B12/OR51L1/OR4K2/OR2A5/OR6C4/CLCA1/OR2L2/OR51A4/OR2J3/OR5AU1/OR1I1/OR1E2/OR4N2/OR5AN1/OR1L8/CNGA3/OR56B1/OR7D2/PDC/OR3A3/PRKG2/OR12D3/OR6C75/OR2V2/OR4E2/OR2AG2/OR2L3/CAMK2A/OR2T12/OR9I1/OR52I2/OR7A5/CAMK2B/OR4D1/OR10K2/OR1S2/OR9A4/OR6C1/OR4M1/OR51D1/OR5I1/OR4K1/OR11A1/OR4P4/OR14A16/OR4K17/OR5T2/OR4K14/OR10A2/OR10G3/OR5A1/OR8B8/OR10H5/OR9G1/OR10H4/OR8G1/OR2Z1/OR9Q2/OR1N2/CNGB1/OR8D1/OR52N4/OR52K1/OR4D6/OR8I2/OR13C9/OR52A5/OR2H2/OR5AS1/OR2A14/OR4K13/OR4N5/OR10K1/OR1D2/OR5M1/OR6K2/OR6C3/OR2T6/OR5A2/OR6A2/OR52N5/OR8H2/OR8D4/OR6Y1/OR4D10/OR13G1/OR2C3/OR5K1/OR2T1/OR5V1/OR7D4/OR10H2/OR51F2/OR5M8/OR52E8/OR13C8/OR52A1/OR4F17/OR1J1/OR2T4/OR51E1/OR2H1/OR6X1/OR1A1/GUCA1C/GUCY2D/OR4D2/OR51A7/OR10A5/OR1A2/OR2G6/OR52J3/OR52B2/OR1J2/OR10Q1/OR10AD1/OR4K15/OR11G2/OR10J1/OR10G8/OR4A15/OR5L2/OR9Q1/OR52E4/OR2G3/OR2A7/OR2D3/OR51G2/OR10Z1/OR52I1/OR4K5/OR9K2/OR10AG1/OR8H1/OR4F6/OR51I2/OR51M1/OR8G5/OR6M1/OR2A2/OR8J3/OR10H3/OR2W3/OR2M5/OR7E24/OR6F1/OR56A5/OR11H4/OR5M9/OR6K3/OR2M4/OR2T29/OR5AC2/OR1N1/OR14C36/OR2M7/OR2B11/OR2A25/OR4B1/OR5D16/OR3A2/OR2AK2/OR4C15/OR8H3/OR2T2/OR13A1/OR6C6/OR5D18/OR52N1/OR2T34/OR5P2/OR1C1/OR1E1/OR1Q1/OR6N1/OR8K5/OR51V1/OR2F2/OR2J2/PDE1C/OR2T3/OR6V1/OR2B6/OR2L13/OR9A2/OR4C12/OR13F1/OR4F15/OR2AT4/OR10T2/OR7G2/OR51I1/OR10S1/OR5H6/OR5M10/OR5B21/OR2T8/OR5T1/OR10A7/OR10G2/OR13C5/OR5B3/OR51B4/PRKG1/OR56A3/OR10G7/OR4A5/OR8U1/OR2T5/OR4C3/OR10A3/OR10P1/OR6C70/OR1L3/OR6C2/OR11H6/OR8J1/OR2B2/OR1G1/OR4D5/PRKACG/OR3A1/OR2A1/OR51Q1/PRKACB/OR51B6/OR2D2/OR2W1/OR14I1/OR1M1/OR2T10/OR6B3/OR7A17/OR52N2/OR4C13/OR2A12/OR4C6/OR51T1/OR1D5/OR10J5/OR4C11/OR56A4/OR11H1/OR2AE1/OR7G1/OR51E2/OR6T1/OR2B3/OR52H1 |
| KEGG_NEUROACTIVE_LIGAND_RECEPTOR_INTERACTION | KEGG_NEUROACTIVE_LIGAND_RECEPTOR_INTERACTION | 270 | 0.513332 | 1.886674 | 1.00E-10 | 8.75E-09 | 8.05E-09 | 4780 | tags=54%, list=27%, signal=41% | GABRB2/GABRA1/GABRG2/HTR5A/GRM4/GRIK1/GABRA4/HTR4/GRIN2B/SSTR2/PLG/GRM8/FPR2/FPR1/GHRHR/OPRM1/CYSLTR2/GRM3/P2RY14/GABRA2/CALCR/ADRA1A/GABRG1/GRIA1/OPRD1/GABRR2/LEPR/GABRA6/CHRM5/ADRA1B/GRM7/HTR7/ADORA1/GLP2R/GRM1/P2RX3/LPAR4/GLRA3/PTGFR/GRID2/GABRB1/OXTR/NPFFR1/CHRNA1/DRD3/TRHR/CHRM2/PRLHR/P2RY8/PTH1R/AVPR1A/MTNR1B/HRH1/GABRR1/GABRQ/GALR1/AGTR1/GRIA4/HTR2A/NPBWR2/MCHR2/RXFP1/CHRNB3/MAS1/GRPR/GABBR2/GPR83/CHRNB4/HCRTR2/GABRA5/HRH4/P2RY13/GRM5/ADRA1D/HTR1F/GRIN2A/GABRB3/GRIN3A/GABRD/CHRNA7/GABRG3/GRIK4/FPR3/MCHR1/GHSR/MC2R/HTR1D/LHCGR/TSHR/GLRA1/PTGER3/GZMA/HTR2B/GHR/VIPR2/CRHR1/ADCYAP1R1/CHRND/GPR50/HRH3/PRL/GRM6/LEP/GNRHR/NPFFR2/F2/CHRNA4/GABRA3/BDKRB1/CNR2/EDNRB/HRH2/THRB/LPAR6/S1PR2/NMUR2/F2RL2/CNR1/CYSLTR1/NPY2R/C3AR1/CCKBR/RXFP2/TAAR1/GABRP/ADRB3/GLRB/FSHB/DRD1/GRID1/GLRA2/PRLR/HTR2C/NTSR1/BRS3/CALCRL/ADRA2C/AVPR1B/ADORA2B/AGTR2/CHRNA2/P2RX1/TAAR8/S1PR4/BDKRB2/GH2/PRSS1 |
| KEGG_NOTCH_SIGNALING_PATHWAY | KEGG_NOTCH_SIGNALING_PATHWAY | 47 | -0.44461 | -2.28674 | 9.49E-06 | 0.000553 | 0.000509 | 1592 | tags=32%, list=9%, signal=29% | CTBP1/MAML3/NUMBL/LFNG/DVL1/HES1/NCOR2/DTX4/NOTCH1/CTBP2/JAG2/DTX2/KAT2A/DLL1/NOTCH3 |
| KEGG_STEROID_HORMONE_BIOSYNTHESIS | KEGG_STEROID_HORMONE_BIOSYNTHESIS | 53 | 0.511405 | 1.673667 | 0.000403 | 0.017645 | 0.016239 | 4175 | tags=47%, list=23%, signal=36% | CYP3A4/HSD11B1/AKR1D1/SRD5A2/HSD3B1/CYP7A1/UGT2A1/UGT2A3/CYP19A1/SULT1E1/CYP11B1/CYP3A43/CYP11B2/HSD3B2/AKR1C3/UGT2B10/AKR1C4/CYP21A2/CYP3A7/CYP1B1/UGT2B28/UGT2B11/CYP1A1/UGT2B4/HSD17B6 |
| KEGG_HEMATOPOIETIC_CELL_LINEAGE | KEGG_HEMATOPOIETIC_CELL_LINEAGE | 85 | 0.459479 | 1.578045 | 0.000607 | 0.02123 | 0.019538 | 5670 | tags=47%, list=32%, signal=32% | CD33/EPO/CD1D/IL5RA/CD38/CR2/IL1A/CR1/CD36/ITGAM/ITGA4/IL1B/FLT3/DNTT/IL1R2/MME/CD4/IL6/CD1A/IL2RA/CD8B/MS4A1/CD8A/CD1B/CD3G/GYPA/GP5/CD1C/CSF3R/FLT3LG/ITGA2/CSF2RA/THPO/TPO/CD1E/IL5/TNF/FCGR1A/CD3E/KITLG |
| KEGG_CIRCADIAN_RHYTHM_MAMMAL | KEGG_CIRCADIAN_RHYTHM_MAMMAL | 12 | -0.67043 | -2.22858 | 0.000844 | 0.024616 | 0.022654 | 1693 | tags=50%, list=9%, signal=45% | PER2/CSNK1E/CRY2/CSNK1D/BHLHE40/PER1 |
| KEGG_COMPLEMENT_AND_COAGULATION_CASCADES | KEGG_COMPLEMENT_AND_COAGULATION_CASCADES | 69 | 0.471692 | 1.586241 | 0.001172 | 0.02929 | 0.026955 | 4792 | tags=46%, list=27%, signal=34% | PLG/CR2/C6/CR1/F13A1/MASP1/TFPI/FGB/C5/CPB2/KNG1/FGA/SERPINC1/C8A/C1QA/C4BPB/FGG/F11/C8B/KLKB1/C7/F2/BDKRB1/C4B/C1QB/C3AR1/C4BPA/C9/SERPINA1/SERPINA5/BDKRB2/F9 |
| KEGG_ABC_TRANSPORTERS | KEGG_ABC_TRANSPORTERS | 44 | 0.526551 | 1.682997 | 0.001458 | 0.02953 | 0.027176 | 2400 | tags=39%, list=13%, signal=34% | ABCD2/ABCG4/ABCB4/ABCC12/ABCC11/ABCA4/ABCC8/ABCB5/ABCG8/ABCA12/ABCG5/CFTR/ABCB11/ABCC9/ABCA6/ABCC2/ABCA9 |
| KEGG_CALCIUM_SIGNALING_PATHWAY | KEGG_CALCIUM_SIGNALING_PATHWAY | 177 | 0.385762 | 1.394275 | 0.001519 | 0.02953 | 0.027176 | 4758 | tags=37%, list=27%, signal=28% | SLC8A1/HTR5A/HTR4/CD38/NOS1/CYSLTR2/PLCZ1/NOS2/ATP2B2/ADRA1A/PRKCG/CAMK2A/CACNA1S/SLC8A2/CHRM5/ADRA1B/HTR7/CAMK2B/MYLK2/GRM1/P2RX3/SLC8A3/PDE1B/PTGFR/CACNA1A/OXTR/TRHR/CHRM2/AVPR1A/CAMK4/HRH1/PRKCB/AGTR1/HTR2A/GRPR/ATP2B3/GRM5/ADRA1D/GRIN2A/PDE1A/CACNA1F/PLN/CHRNA7/RYR3/LHCGR/CACNA1B/PTGER3/HTR2B/CACNA1G/MYLK3/BDKRB1/EDNRB/HRH2/CYSLTR1/SLC25A5/CCKBR/ADRB3/DRD1/HTR2C/NTSR1/RYR2/AVPR1B/ADORA2B/PDE1C/P2RX1/BDKRB2 |

**Supplementary Table 6:** The results of correlation between NR4A1 and immune cell.

| **cell** | **Correlation** | **p.value** |
| --- | --- | --- |
| CD56dim natural killer cell | 0.591176 | 0.015876 |
| Central memory CD8 T cell | -0.54118 | 0.0304 |
| Effector memory CD4 T cell | -0.67941 | 0.003793 |
| Gamma delta T cell | -0.77941 | 0.000372 |
| Immature dendritic cell | -0.65294 | 0.006102 |
| Macrophage | -0.65 | 0.006416 |
| Neutrophil | -0.71471 | 0.001863 |
| Regulatory T cell | -0.68235 | 0.003588 |

**Supplementary Table 7:** The results of correlation between CLEC4G and immune cell.

| **cell** | **Correlation** | **p.value** |
| --- | --- | --- |
| Effector memory CD4 T cell | 0.628321 | 0.009144 |
| Gamma delta T cell | 0.513277 | 0.042011 |
| Immature dendritic cell | 0.569324 | 0.021342 |
| Regulatory T cell | 0.595873 | 0.014858 |

**Supplementary Table 8:** The results of correlation between CD163 and immune cell.

| **cell** | **Correlation** | **p.value** |
| --- | --- | --- |
| Activated B cell | 0.588235 | 0.01654 |
| Activated CD4 T cell | 0.576471 | 0.019415 |
| CD56dim natural killer cell | -0.57059 | 0.020991 |
| Effector memory CD4 T cell | 0.802941 | 0.000181 |
| Gamma delta T cell | 0.591176 | 0.015876 |
| Immature B cell | 0.679412 | 0.003793 |
| Immature dendritic cell | 0.702941 | 0.002387 |
| Macrophage | 0.588235 | 0.01654 |
| Natural killer T cell | 0.579412 | 0.018663 |
| Neutrophil | 0.561765 | 0.023537 |
| Regulatory T cell | 0.876471 | 8.44E-06 |
| T follicular helper cell | 0.597059 | 0.01461 |
